# Supplementary material for: Total Binding Affinity Profiles of Regulatory Regions Predict Transcription Factor Binding and Gene Expression in Human Cells
Source: PubMed Central journal article supplement (PMC4658012; doi:10.1371/journal.pone.0143627), 2015-11-24
Supplement: pone.0143627.s001.pdf [file pone.0143627.s001.pdf]

Color Key

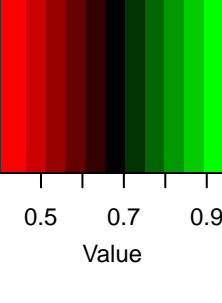

0.5 0.7 0.9  
Value

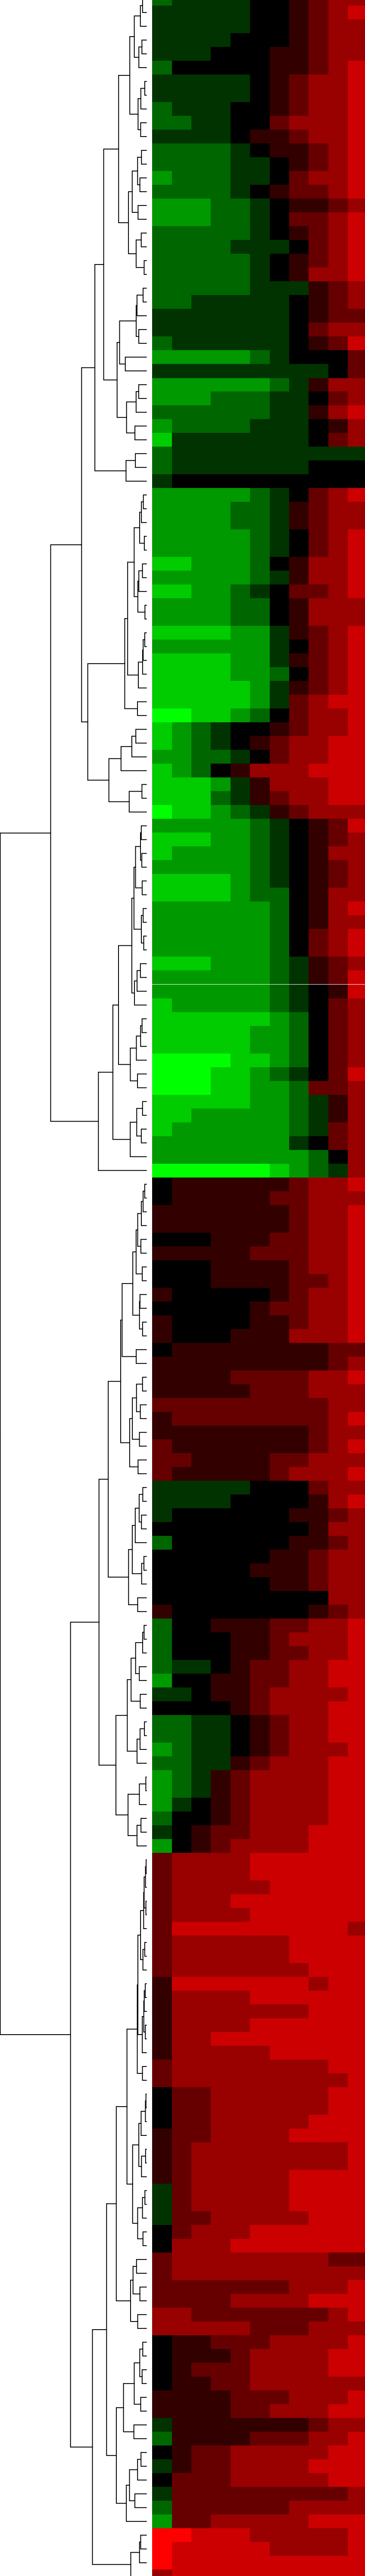

- jolma2013-ETS1-3@2113
- JASPAR-2014-SP2-MA0516.1@6668
- JASPAR-2014-E2F6-MA0471.1@1876
- jolma2013-ETS1@2113
- JASPAR-2014-YY1-MA0095.2@7528
- jolma2013-TFAP2A-3@7020
- jolma2013-RUNX3-4@864
- jolma2013-RUNX3-2@864
- JASPAR-2014-ZBTB33-MA0527.1@10009
- jolma2013-MAFK-4@7975
- jolma2013-EBF1@1879
- jolma2013-MAX-2@4149
- JASPAR-2014-TCF7L2-MA0523.1@6934
- JASPAR-2014-GATA2-MA0036.2@2624
- JASPAR-2014-ZNF263-MA0528.1@10127
- jolma2013-BHLHB2@8553
- jolma2013-PRDM1@639
- JASPAR-CORE-FOXA1-MA0148.1@3169
- jolma2013-YY1@7528
- JASPAR-2014-ELF1-MA0473.1@1997
- JASPAR-2014-FOXA1-MA0148.3@3169
- jolma2013-GATA3@2625
- jolma2013-GATA3-2@2625
- JASPAR-CORE-GATA3-MA0037.1@2625
- JASPAR-2014-THAP1-MA0597.1@55145
- jolma2013-TCF3@6929
- JASPAR-CORE-USF1-MA0093.1@7391
- JASPAR-CORE-SPI1-MA0080.2@6688
- jolma2013-TFAP2C-6@7022
- JASPAR-2014-FOSL2-MA0478.1@2355
- JASPAR-2014-JUN-var.2-MA0489.1@3725
- JASPAR-2014-ZEB1-MA0103.2@6935
- JASPAR-2014-E2F1-MA0024.2@1869
- hPDI-USF2@7392
- hPDI-ESRRA@2101
- hPDI-USF1@7391
- JASPAR-2014-PRDM1-MA0508.1@639
- JASPAR-2014-EGR1-MA0162.2@1958
- jolma2013-GABPA@2551
- jolma2013-TFAP2A-4@7020
- jolma2013-TFAP2C-2@7022
- JASPAR-2014-HNF4A-MA0114.2@3172
- JASPAR-2014-HNF4G-MA0484.1@3174
- jolma2013-EGR1@1958
- jolma2013-CEBPB@1051
- jolma2013-CEBPB-2@1051
- jolma2013-TFAP2A-5@7020
- jolma2013-TFAP2C@7022
- JASPAR-2014-TFAP2C-MA0524.1@7022
- JASPAR-2014-MAFK-MA0496.1@7975
- JASPAR-2014-TFAP2A-MA0003.2@7020
- JASPAR-2014-MAFF-MA0495.1@23764
- JASPAR-CORE-CTCF-MA0139.1@10664
- jolma2013-SP4@6671
- jolma2013-CTCF@10664
- jolma2013-MAFK-2@7975
- jolma2013-E2F1-3@1869
- jolma2013-E2F1-2@1869
- jolma2013-E2F1@1869
- JASPAR-2014-NFYA-MA0060.2@4800
- jolma2013-ESRRA@2101
- JASPAR-2014-ESRRA-MA0592.1@2101
- JASPAR-2014-E2F4-MA0470.1@1874
- JASPAR-2014-CEBPB-MA0466.1@1051
- jolma2013-ELK1-4@2002
- jolma2013-ELK1-2@2002
- jolma2013-TFAP2A-2@7020
- JASPAR-2014-USF1-MA0093.2@7391
- jolma2013-TFAP2A@7020
- jolma2013-TFAP2C-4@7022
- jolma2013-USF1@7391
- jolma2013-MAFK-3@7975
- jolma2013-ESRRA-4@2101
- JASPAR-CORE-ELK4-MA0076.1@2005
- JASPAR-2014-ELK4-MA0076.2@2005
- jolma2013-ELK1@2002
- JASPAR-2014-USF2-MA0526.1@7392
- jolma2013-ELK4@2005
- JASPAR-2014-NFYB-MA0502.1@4801
- jolma2013-NRF1@4899
- JASPAR-CORE-ELK1-MA0028.1@2002
- JASPAR-2014-FOS-MA0476.1@2353
- JASPAR-2014-JUNB-MA0490.1@3726
- jolma2013-MAFK@7975
- JASPAR-CORE-TFAP2A-MA0003.1@7020
- JASPAR-2014-NRF1-MA0506.1@4899
- JASPAR-2014-HSF1-MA0486.1@3297
- jolma2013-NR2C2@7182
- jolma2013-HSF1@3297
- JASPAR-2014-IRF1-MA0050.2@3659
- JASPAR-2014-RFX5-MA0510.1@5993
- JASPAR-2014-STAT3-MA0144.2@6774
- JASPAR-2014-MAX-MA0058.2@4149
- JASPAR-2014-NR2C2-MA0504.1@7182
- JASPAR-2014-SRF-MA0083.2@6722
- JASPAR-2014-MEF2C-MA0497.1@4208
- JASPAR-2014-MEF2A-MA0052.2@4205
- jolma2013-SRF@6722
- hPDI-RXRA@6256
- JASPAR-CORE-YY1-MA0095.1@7528
- JASPAR-2014-JUN-MA0488.1@3725
- jolma2013-MEF2A@4205
- hPDI-FOXM1@2305
- hPDI-GTF2B@2959
- JASPAR-CORE-NFIC-MA0161.1@4782
- JASPAR-CORE-IRF1-MA0050.1@3659
- jolma2013-CEBPD@1052
- JASPAR-CORE-SRF-MA0083.1@6722
- JASPAR-2014-EBF1-MA0154.2@1879
- JASPAR-2014-JUND-MA0491.1@3727
- JASPAR-2014-STAT1-MA0137.3@6772
- jolma2013-TEAD4@7004
- JASPAR-CORE-RELA-MA0107.1@5970
- JASPAR-2014-SP1-MA0079.3@6667
- JASPAR-CORE-SP1-MA0079.2@6667
- jolma2013-SP1@6667
- JASPAR-CORE-GATA2-MA0036.1@2624
- JASPAR-2014-FOSL1-MA0477.1@8061
- JASPAR-CORE-REST-MA0138.2@5978
- jolma2013-TFAP2C-3@7022
- jolma2013-TFAP2A-6@7020
- jolma2013-SPI1@6688
- jolma2013-EGR1-2@1958
- jolma2013-MAFF@23764
- JASPAR-CORE-ESR1-MA0112.2@2099
- jolma2013-ZBTB7A@51341
- JASPAR-2014-PAX5-MA0014.2@5079
- jolma2013-ELF1@1997
- jolma2013-PAX5@5079
- jolma2013-HNF4A-3@3172
- jolma2013-HNF4A-5@3172
- jolma2013-HNF4A-6@3172
- jolma2013-HNF4A-2@3172
- jolma2013-HNF4A@3172
- jolma2013-HNF4A-4@3172
- jolma2013-HNF4A-1@3172
- jolma2013-NFATC1-3@4772
- jolma2013-E2F1-4@1869
- jolma2013-NFATC1-2@4772
- jolma2013-NFATC1@4772
- hPDI-LOC653972@11335
- jolma2013-RXRA-2@6256
- jolma2013-RXRA-4@6256
- jolma2013-ZNF143@7702
- hPDI-TFAP2A@7020
- jolma2013-E2F4-2@1874
- JASPAR-2014-TLX1::NFIC-MA0119.1@4782
- jolma2013-ETS1-4@2113
- jolma2013-MYBL2-2@4605
- jolma2013-IRF4@3662
- hPDI-GTF3C2@2976
- hPDI-JARID1A@5927
- jolma2013-RXRA@6256
- jolma2013-RXRA-3@6256
- jolma2013-ESRRA-5@2101
- jolma2013-RUNX3@864
- jolma2013-RFX5-2@5993
- jolma2013-RFX5@5993
- jolma2013-RUNX3-3@864
- jolma2013-MAX@4149
- jolma2013-ETS1-2@2113
- jolma2013-ESRRA-2@2101
- jolma2013-MYBL2@4605
- jolma2013-MYBL2-4@4605
- hPDI-ETS1@2113
- hPDI-CREB1@1385
- JASPAR-2014-JUND-var.2-MA0492.1@3727
- JASPAR-CORE-BRCA1-MA0133.1@672
- JASPAR-2014-POU2F2-MA0507.1@5452
- jolma2013-POU2F2@5452
- jolma2013-ELF1-2@1997
- jolma2013-MYBL2-3@4605
- jolma2013-NR3C1@2908
- jolma2013-NFE2@4778
- jolma2013-HSF1-2@3297
- jolma2013-SRF-2@6722
- JASPAR-2014-GATA3-MA0037.2@2625
- jolma2013-TFAP2C-5@7022
- jolma2013-ESRRA-6@2101
- jolma2013-ESRRA-3@2101
- jolma2013-ESR1@2099
- hPDI-RBBP5@5929
- JASPAR-CORE-E2F1-MA0024.1@1869
- jolma2013-ELK1-3@2002
- jolma2013-POU2F2-2@5452
- JASPAR-2014-FOXP2-MA0593.1@93986
- jolma2013-IRF3@3661
- hPDI-IRF1@3659

TBA  
0.1  
0.2  
0.3  
0.4  
0.5  
0.6  
0.7  
0.8  
0.9  
1
