# Supplementary material for: Total Binding Affinity Profiles of Regulatory Regions Predict Transcription Factor Binding and Gene Expression in Human Cells
Source: PubMed Central journal article supplement (PMC4658012; doi:10.1371/journal.pone.0143627), 2015-11-24

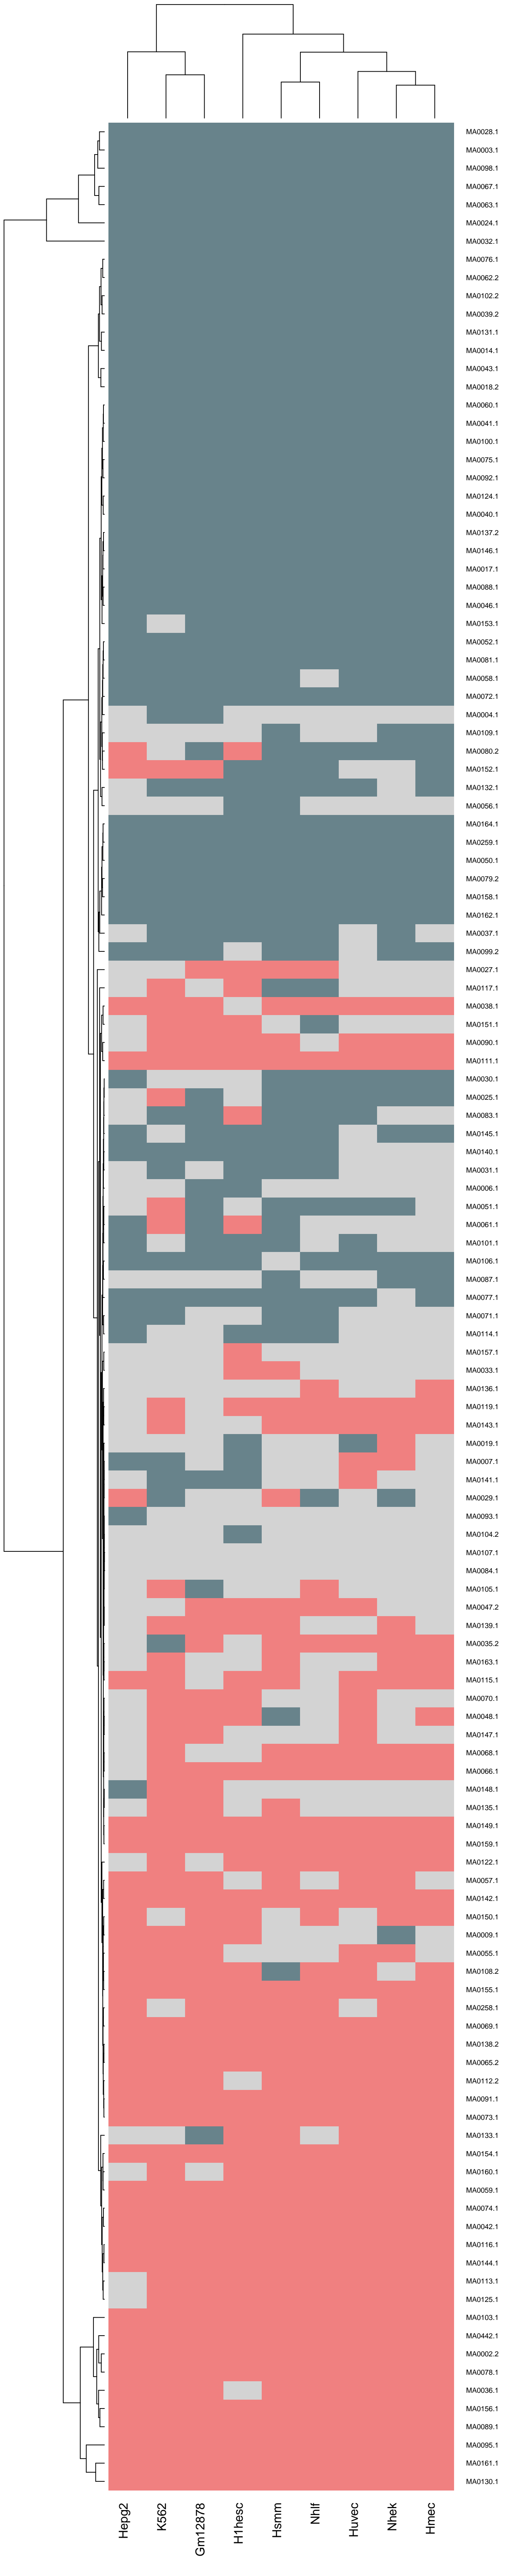

Supplement: pone.0143627.s002.pdf [file pone.0143627.s002.pdf]
